# Supplementary material for: Dual species dynamic transcripts reveal the interaction mechanisms between Chrysanthemum morifolium and Alternaria alternata
Source: PubMed Central journal article supplement (PMC8268330; doi:10.1186/s12864-021-07709-9), 2021-07-09

### Ascorbic acid

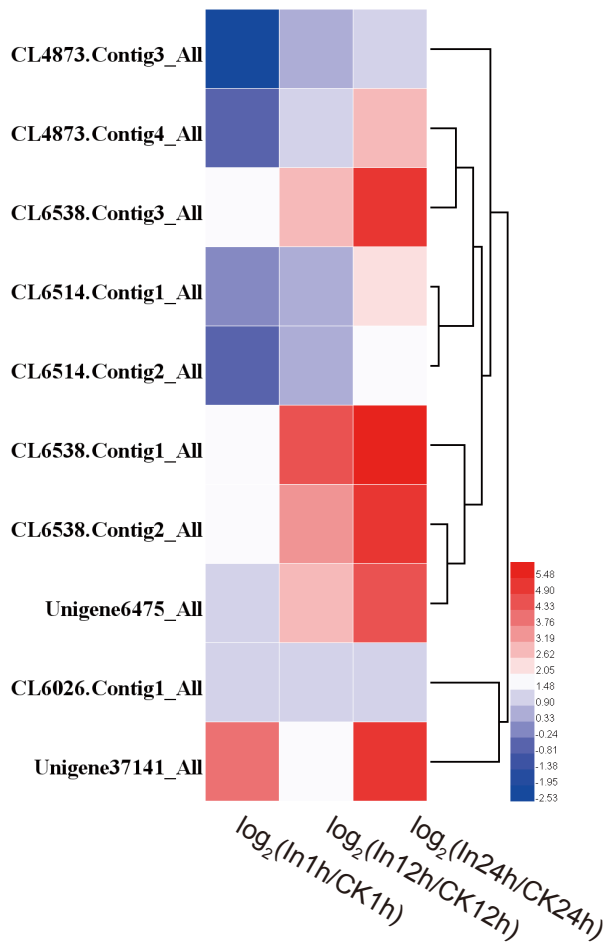

### Glutathione

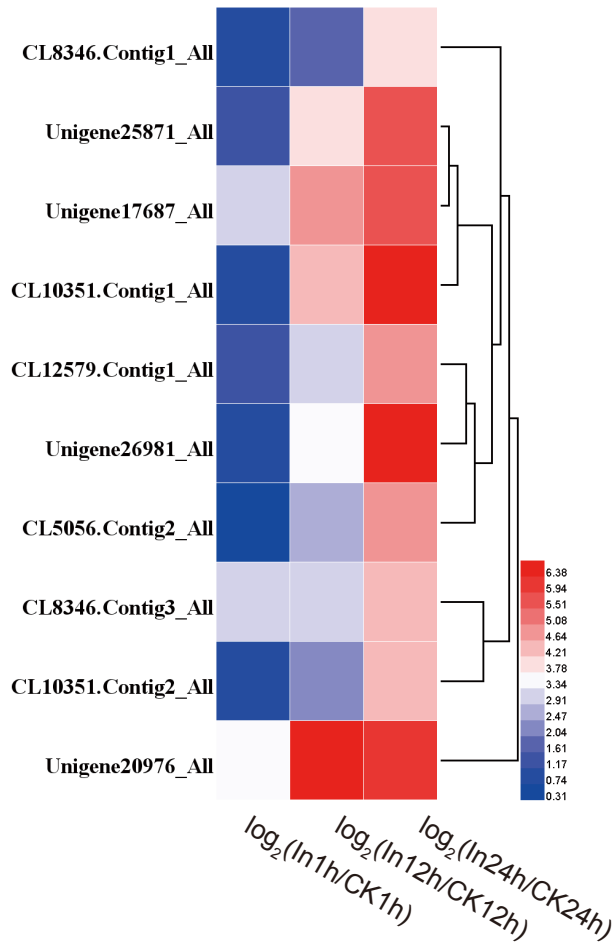

Supplement: 12864_2021_7709_MOESM2_ESM.pdf [file 12864_2021_7709_MOESM2_ESM.pdf]
